# Supplementary material
Source: PubMed Central journal article supplement (PMC8755498)

# SUPPLEMENTARY MATERIALS

## Supplementary Tables

**Supplementary Table 1. Cohort and lung cancer case characteristics overall and by smoking status among males in the Sutter Health + Kaiser Hawai'i cohort, 2000-2013**

| Characteristic                         | Male Cohort                |                |                | Male Incident Lung Cancer Cases |                |              |
|----------------------------------------|----------------------------|----------------|----------------|---------------------------------|----------------|--------------|
|                                        | Total No. (%) <sup>d</sup> | Smoking Status |                | Total No. (%) <sup>d</sup>      | Smoking Status |              |
|                                        |                            | Never No. (%)  | Ever No. (%)   |                                 | Never No. (%)  | Ever No. (%) |
| Total                                  | 896,251 (100.0)            | 545,543 (60.9) | 350,708 (39.1) | 2,892 (100.0)                   | 429 (14.8)     | 2,463 (85.2) |
| Age at baseline/diagnosis <sup>a</sup> |                            |                |                |                                 |                |              |
| 18-29                                  | 219,715 (24.5)             | 150,322 (68.4) | 69,393 (31.6)  | 8 (0.3)                         | 5 (62.5)       | —            |
| 30-39                                  | 194,061 (21.7)             | 131,728 (67.9) | 62,333 (32.1)  | 13 (0.4)                        | 10 (76.9)      | —            |
| 40-49                                  | 172,213 (19.2)             | 109,640 (63.7) | 62,573 (36.3)  | 78 (2.7)                        | 19 (24.4)      | 59 (75.6)    |
| 50-59                                  | 141,021 (15.7)             | 77,277 (54.8)  | 63,744 (45.2)  | 351 (12.1)                      | 58 (16.5)      | 293 (83.5)   |
| 60-69                                  | 90,562 (10.1)              | 42,114 (46.5)  | 48,448 (53.5)  | 765 (26.5)                      | 87 (11.4)      | 678 (88.6)   |
| 70-79                                  | 52,180 (5.8)               | 22,263 (42.7)  | 29,917 (57.3)  | 974 (33.7)                      | 121 (12.4)     | 853 (87.6)   |
| 80+                                    | 26,499 (3.0)               | 12,199 (46.0)  | 14,300 (54.0)  | 703 (24.3)                      | 129 (18.3)     | 574 (81.7)   |
| Baseline Year                          |                            |                |                |                                 |                |              |
| 2000-2004                              | 239,821 (26.8)             | 136,958 (57.1) | 102,863 (42.9) | 1,526 (52.8)                    | 208 (13.6)     | 1,318 (86.4) |
| 2005-2009                              | 293,141 (32.7)             | 178,939 (61.0) | 114,202 (39.0) | 843 (29.1)                      | 134 (15.9)     | 709 (84.1)   |
| 2010-2013                              | 363,289 (40.5)             | 229,646 (63.2) | 133,643 (36.8) | 523 (18.1)                      | 87 (16.6)      | 436 (83.4)   |
| Race/Ethnicity                         |                            |                |                |                                 |                |              |
| Any AANHPI                             | 180,171 (20.1)             | 115,573 (64.1) | 64,598 (35.9)  | 511 (17.7)                      | 97 (19.0)      | 414 (81.0)   |
| Any NHPI                               | 37,719 (4.2)               | 19,225 (51.0)  | 18,494 (49.0)  | 169 (5.8)                       | 14 (8.3)       | 155 (91.7)   |
| Native Hawaiian <sup>b</sup>           | 23,031 (2.6)               | 11,565 (50.2)  | 11,466 (49.8)  | 133 (4.6)                       | 10 (7.5)       | 123 (92.5)   |
| Pacific Islander <sup>c</sup>          | 14,688 (1.6)               | 7,660 (52.2)   | 7,028 (47.8)   | 36 (1.2)                        | —              | 32 (88.9)    |
| Asian (single or multiple group)       | 142,452 (15.9)             | 96,348 (67.6)  | 46,104 (32.4)  | 342 (11.8)                      | 83 (24.3)      | 259 (75.7)   |
| Asian (single group)                   | 122,290 (13.6)             | 84,033 (68.7)  | 38,257 (31.3)  | 260 (9.0)                       | 65 (25.0)      | 195 (75.0)   |
| Asian Indian                           | 34,127 (3.8)               | 27,100 (79.4)  | 7,027 (20.6)   | 8 (0.3)                         | —              | 5 (62.5)     |
| Chinese                                | 26,836 (3.0)               | 20,918 (77.9)  | 5,918 (22.1)   | 50 (1.7)                        | 23 (46.0)      | 27 (54.0)    |
| Japanese                               | 14,096 (1.6)               | 7,860 (55.8)   | 6,236 (44.2)   | 69 (2.4)                        | 13 (18.8)      | 56 (81.2)    |
| Filipinx                               | 25,945 (2.9)               | 14,114 (54.4)  | 11,831 (45.6)  | 88 (3.0)                        | 16 (18.2)      | 72 (81.8)    |
| Korean                                 | 3,497 (0.4)                | 1,990 (56.9)   | 1,507 (43.1)   | 11 (0.4)                        | —              | 10 (90.9)    |
| Vietnamese                             | 2,338 (0.3)                | 1,495 (63.9)   | 843 (36.1)     | 5 (0.2)                         | (0.0)          | —            |
| Other Asian (single group)             | 15,451 (1.7)               | 10,556 (68.3)  | 4,895 (31.7)   | 30 (1.0)                        | 9 (30.0)       | 21 (70.0)    |
| Asian (multiple group)                 | 20,162 (2.2)               | 12,315 (61.1)  | 7,847 (38.9)   | 82 (2.8)                        | 18 (22.0)      | 64 (78.0)    |
| Asian only multiple                    | 5,005 (0.6)                | 3,227 (64.5)   | 1,778 (35.5)   | 7 (0.2)                         | (0.0)          | 7 (100.0)    |
| Asian & non-Asian                      | 15,157 (1.7)               | 9,088 (60.0)   | 6,069 (40.0)   | 75 (2.6)                        | 18 (24.0)      | 57 (76.0)    |
| Non-Hispanic White                     | 370,092 (41.3)             | 216,568 (58.5) | 153,524 (41.5) | 982 (34.0)                      | 127 (12.9)     | 855 (87.1)   |
| Black                                  | 21,230 (2.4)               | 12,119 (57.1)  | 9,111 (42.9)   | 66 (2.3)                        | 13 (19.7)      | 53 (80.3)    |
| Hispanic                               | 66,216 (7.4)               | 41,585 (62.8)  | 24,631 (37.2)  | 72 (2.5)                        | 17 (23.6)      | 55 (76.4)    |
| Non-AANHPI multiple                    | 23,410 (2.6)               | 13,224 (56.5)  | 10,186 (43.5)  | 117 (4.0)                       | 15 (12.8)      | 102 (87.2)   |

|                   |                |                |               |              |            |            |
|-------------------|----------------|----------------|---------------|--------------|------------|------------|
| Other (incl AIAN) | 17,924 (2.0)   | 10,861 (60.6)  | 7,063 (39.4)  | 35 (1.2)     | 6 (17.1)   | 29 (82.9)  |
| Unknown           | 217,208 (24.2) | 135,613 (62.4) | 81,595 (37.6) | 1,109 (38.3) | 154 (13.9) | 955 (86.1) |

<sup>a</sup> Age at baseline among cohort, age at diagnosis among cases. AANHPI = Asian American, Native Hawaiian, and Pacific Islander; NHPI = Native Hawaiian and Pacific Islander; AIAN = American Indian and Alaska Native. The symbol '—' indicates censoring due to low numbers (<5 individuals).

<sup>b</sup> Individuals indicating *any* Native Hawaiian, even if also indicating other races/ethnicities, are categorized as 'Native Hawaiian'.

<sup>c</sup> Pacific Islander, not indicating Native Hawaiian

<sup>d</sup> Column percentages are provided in 'Total' columns. All other columns with proportions present row percentages.

**Supplementary Table 2:** Age-adjusted incidence rates for overall lung cancer (not stratified by smoking status) among females and males.<sup>a</sup>

| Race/Ethnicity                | Females      |       |                  | Males        |       |                   |
|-------------------------------|--------------|-------|------------------|--------------|-------|-------------------|
|                               | Person-years | Cases | AAIR (95% CI)    | Person-years | Cases | AAIR (95% CI)     |
| Any AANHPI                    | 1,567,336    | 613   | 32.9 (30.3-35.6) | 1,132,268    | 615   | 46.8 (43.1, 50.6) |
| Any NHPI                      | 374,861      | 201   | 53.5 (46.0-61.4) | 306,072      | 208   | 73.2 (62.8, 84.4) |
| Native Hawaiian <sup>b</sup>  | 247,380      | 160   | 59.3 (50.2-69.2) | 200,091      | 168   | 81.5 (68.8, 95.3) |
| Pacific Islander <sup>c</sup> | 127,480      | 41    | 35.9 (25.0-48.7) | 105,982      | 40    | 51.1 (35.1, 70.1) |
| Any Asian                     | 1,192,475    | 412   | 27.8 (25.1-30.7) | 826,196      | 407   | 39.4 (35.7, 43.4) |
| Asian (single group)          | 970,734      | 296   | 25.0 (22.0-28.2) | 699,321      | 307   | 36.7 (32.7, 41.0) |
| Chinese                       | 220,199      | 75    | 26.2 (20.5-32.5) | 151,851      | 56    | 28.2 (21.2, 36.1) |
| Japanese                      | 164,836      | 74    | 19.1 (14.8-24.0) | 122,202      | 86    | 33.4 (26.6, 41.0) |
| Filipinx                      | 240,640      | 80    | 29.0 (22.7-36.1) | 176,600      | 103   | 46.6 (37.5, 56.7) |
| Other Asian                   | 345,059      | 67    | 27.4 (20.4-35.5) | 248,668      | 62    | 38.2 (28.9, 48.7) |
| Asian (multiple group)        | 221,741      | 116   | 40.3 (33.1-48.1) | 126,874      | 100   | 52.8 (42.9, 63.8) |
| Non-Hispanic White            | 3,022,262    | 1,489 | 28.6 (27.2-30.1) | 2,139,162    | 1,125 | 30.6 (28.8, 32.4) |
| Black                         | 166,412      | 91    | 37.5 (30.0-45.8) | 100,545      | 69    | 57.4 (43.9, 72.8) |
| Hispanic                      | 521,802      | 81    | 15.7 (12.4-19.3) | 341,721      | 79    | 22.2 (17.4, 27.5) |
| Non-AANHPI multiple           | 210,757      | 125   | 44.0 (36.5-52.2) | 133,497      | 139   | 59.4 (49.8, 69.9) |
| Unknown                       | 2,048,203    | 1,445 | 59.7 (56.5-62.9) | 1,619,942    | 1,339 | 70.3 (66.5, 74.2) |

<sup>a</sup> These overall incidence rates are provided in order to compare our results to those from previous studies in which lung cancer incidence rates were not stratified by smoking status; Sutter Health + Kaiser Hawai'i cohort, 2000-2013. AANHPI = Asian American, Native Hawaiian, or Pacific Islander; NHPI = Native Hawaiian or Pacific Islander; AIAN = American Indian or Alaska Native.

<sup>b</sup> Individuals indicating *any* Native Hawaiian, even if also indicating other races/ethnicities, are categorized as 'Native Hawaiian'.

<sup>c</sup> Pacific Islander, not indicating Native Hawaiian

**Supplementary Table 3:** Age-adjusted incidence rates (AAIRs) and 95% confidence intervals (CIs) for non-small cell lung cancer (NSCLC) among females and males; Sutter Health + Kaiser Hawai'i cohort, 2000-2013.

| Race/ethnicity                | Non-small cell lung cancer incidence |       |                   |              |       |                   |
|-------------------------------|--------------------------------------|-------|-------------------|--------------|-------|-------------------|
|                               | Never-smoking                        |       |                   | Ever-smoking |       |                   |
|                               | Person-years                         | Cases | AAIR (95% CI)     | Person-years | Cases | AAIR (95% CI)     |
| <b>Females</b>                |                                      |       |                   |              |       |                   |
| Any AANHPI                    | 1,176,244                            | 208   | 15.2 (13.1, 17.4) | 363,277      | 210   | 45.8 (39.7, 52.3) |
| Any NHPI                      | 207,462                              | 30    | 14.8 (9.8, 20.7)  | 161,166      | 98    | 60.3 (48.0, 74.0) |
| Native Hawaiian <sup>a</sup>  | 130,770                              | 22    | 16.1 (10.0, 23.6) | 114,497      | 81    | 65.8 (51.2, 82.3) |
| Pacific Islander <sup>b</sup> | —                                    | —     | —                 | 46,669       | 17    | 41.1 (23.0, 64.4) |
| Any Asian                     | 968,782                              | 178   | 15.5 (13.1, 18.1) | 202,111      | 112   | 38.1 (31.3, 45.5) |
| Asian (single group)          | 807,753                              | 138   | 14.7 (12.0, 17.6) | 144,445      | 74    | 33.8 (26.5, 42.0) |
| Chinese                       | 200,961                              | 53    | 20.6 (15.3, 26.6) | —            | —     | —                 |
| Japanese                      | 118,253                              | 16    | 5.9 (3.2, 9.5)    | 44,423       | 27    | 28.4 (18.4, 40.5) |
| Filipinx                      | 186,809                              | 37    | 16.4 (11.2, 22.5) | 50,043       | 25    | 42.7 (27.2, 61.5) |
| Other Asian                   | 301,730                              | 32    | 16.0 (10.0, 23.5) | 34,627       | 16    | 38.2 (21.1, 60.2) |
| Asian (multiple group)        | 161,030                              | 40    | 19.6 (13.9, 26.3) | 57,666       | 38    | 50.6 (35.8, 68.0) |
| Non-Hispanic White            | 1,953,948                            | 257   | 8.5 (7.5, 9.6)    | 983,234      | 725   | 35.7 (33.1, 38.4) |
| Black                         | —                                    | —     | —                 | 51,882       | 48    | 47.4 (34.6, 62.3) |
| Hispanic                      | 392,387                              | 25    | 6.8 (4.4, 9.7)    | 113,548      | 37    | 27.6 (19.1, 37.6) |
| Non-AANHPI multiple           | —                                    | —     | —                 | 70,097       | 56    | 50.9 (38.2, 65.4) |
| Unknown                       | 1,369,363                            | 192   | 13.0 (11.2, 15.0) | 490,087      | 522   | 70.6 (64.5, 76.9) |
| <b>Males</b>                  |                                      |       |                   |              |       |                   |
| Any AANHPI                    | 665,468                              | 74    | 11.7 (9.1, 14.6)  | 453,135      | 313   | 46.7 (41.6, 52.1) |
| Any NHPI                      | —                                    | —     | —                 | 154,753      | 113   | 71.9 (57.8, 87.6) |
| Native Hawaiian <sup>a</sup>  | —                                    | —     | —                 | 102,894      | 87    | 75.6 (58.9, 94.2) |
| Pacific Islander <sup>†</sup> | —                                    | —     | —                 | 51,858       | 26    | 61.9 (37.6, 92.1) |
| Any Asian                     | 515,973                              | 64    | 12.2 (9.4, 15.5)  | 298,382      | 200   | 39.7 (34.4, 45.4) |
| Asian (single group)          | 444,462                              | 50    | 11.5 (8.5, 15.0)  | 244,254      | 147   | 36.9 (31.1, 43.1) |
| Chinese                       | 114,458                              | 20    | 15.9 (9.6, 23.8)  | 35,191       | 19    | 26.4 (15.9, 39.6) |
| Japanese                      | —                                    | —     | —                 | 56,860       | 41    | 28.1 (20.0, 37.7) |
| Filipinx                      | —                                    | —     | —                 | 83,711       | 55    | 40.4 (30.0, 52.4) |
| Other Asian                   | —                                    | —     | —                 | 68,492       | 32    | 51.1 (34.5, 70.8) |
| Asian (multiple group)        | —                                    | —     | —                 | 54,128       | 53    | 51.4 (38.4, 66.2) |
| Non-Hispanic White            | 1,201,296                            | 101   | 6.4 (5.2, 7.8)    | 872,667      | 615   | 31.2 (28.7, 33.8) |
| Black                         | —                                    | —     | —                 | 42,308       | 45    | 67.3 (48.1, 89.6) |
| Hispanic                      | —                                    | —     | —                 | 128,613      | 38    | 21.0 (14.7, 28.2) |
| Non-AANHPI multiple           | —                                    | —     | —                 | 60,603       | 71    | 56.1 (43.1, 70.8) |
| Unknown                       | 919,115                              | 105   | 12.8 (10.3, 15.5) | 569,301      | 589   | 66.6 (61.3, 72.2) |

<sup>a</sup> Individuals indicating *any* Native Hawaiian, even if also indicating other races/ethnicities, are categorized as 'Native Hawaiian'. AANHPI = Asian American, Native Hawaiian, or Pacific Islander; NHPI = Native Hawaiian or Pacific Islander; AIAN = American Indian or Alaska Native; AAIR = age-adjusted incidence rate; CI = confidence interval. The symbol '—' indicates censoring of incidence rate due to low numbers (<16 individuals).

<sup>b</sup> Pacific Islander, not indicating Native Hawaiian

**Supplementary Table 4:** Age-adjusted incidence rates (AAIRs) and 95% confidence intervals (CIs) for lung cancer among never-smoking females for sensitivity analyses addressing potential smoking misclassification and loss to follow-up; Sutter Health + Kaiser Hawai'i cohort, 2000-2013.<sup>a</sup>

| Race/Ethnicity                | Main analysis <sup>a</sup> |                   | Sensitivity analyses                   |                  |                           |                                |                  |                           |
|-------------------------------|----------------------------|-------------------|----------------------------------------|------------------|---------------------------|--------------------------------|------------------|---------------------------|
|                               |                            |                   | Smoking misclassification <sup>d</sup> |                  |                           | Loss to follow-up <sup>e</sup> |                  |                           |
|                               | Cases                      | AAIR (95% CI)     | Cases                                  | AAIR (95% CI)    | % Difference <sup>f</sup> | Cases                          | AAIR (95% CI)    | % Difference <sup>f</sup> |
| Any AANHPI                    | 235                        | 17.1 (14.9, 19.4) | 240                                    | 17.4 (15.2-19.8) | 2.2                       | 235                            | 17.2 (15.0-19.5) | 0.7                       |
| Any NHPI                      | 31                         | 15.2 (10.2, 21.2) | 33                                     | 16.1 (11.0-22.3) | 6.1                       | 31                             | 15.3 (10.3-21.3) | 0.8                       |
| Native Hawaiian <sup>b</sup>  | 23                         | 16.7 (10.5, 24.3) | 25                                     | 18.1 (11.6-25.9) | 8.0                       | 23                             | 16.8 (10.6-24.5) | 0.7                       |
| Pacific Islander <sup>c</sup> | —                          | —                 | —                                      | —                | —                         | —                              | —                | —                         |
| Any Asian                     | 204                        | 17.5 (15.0, 20.2) | 207                                    | 17.8 (15.3-20.5) | 1.5                       | 204                            | 17.7 (15.1-20.3) | 0.7                       |
| Asian (single group)          | 158                        | 16.7 (13.9, 19.8) | 159                                    | 16.8 (14.0-19.9) | 0.5                       | 158                            | 16.8 (14.0-19.9) | 0.7                       |
| Chinese                       | 59                         | 22.8 (17.3, 29.1) | 59                                     | 22.8 (17.3-29.1) | 0.0                       | 59                             | 22.9 (17.4-29.2) | 0.4                       |
| Japanese                      | 18                         | 6.4 (3.6, 10.0)   | 18                                     | 6.4 (3.6-10.0)   | 0.0                       | 18                             | 6.4 (3.6-10.0)   | 0.6                       |
| Filipina                      | 42                         | 20.1 (14.1, 27.1) | 43                                     | 20.4 (14.4-27.4) | 1.5                       | 42                             | 20.3 (14.2-27.4) | 1.1                       |
| Other Asian                   | 39                         | 20.3 (13.4, 28.5) | 39                                     | 20.3 (13.4-28.5) | 0.0                       | 39                             | 20.4 (13.5-28.6) | 0.5                       |
| Asian (multiple group)        | 46                         | 22.2 (16.1, 29.3) | 48                                     | 23.2 (16.9-30.4) | 4.3                       | 46                             | 22.4 (16.2-29.5) | 0.7                       |
| Non-Hispanic White            | 306                        | 10.1 (9.0, 11.3)  | 312                                    | 10.3 (9.2-11.5)  | 2.0                       | 306                            | 10.2 (9.0-11.3)  | 0.8                       |
| Black                         | —                          | —                 | —                                      | —                | —                         | —                              | —                | —                         |
| Hispanic                      | 31                         | 8.5 (5.7, 11.8)   | 32                                     | 8.7 (5.9-12.0)   | 2.5                       | 31                             | 8.5 (5.7-11.8)   | 0.5                       |
| Non-AANHPI multiple           | —                          | —                 | 17                                     | 10.5 (6.0-16.2)  | —                         | —                              | —                | —                         |
| Unknown                       | 281                        | 18.1 (15.9, 20.4) | 284                                    | 18.4 (16.2-20.7) | 1.4                       | 281                            | 18.9 (16.6-21.3) | 4.5                       |

<sup>a</sup> AAIRs for never-smoking lung cancer among females in the main analysis (presented in **Figure 1**) are provided for comparison. AANHPI = Asian American, Native Hawaiian, or Pacific Islander; NHPI = Native Hawaiian or Pacific Islander; AIAN = American Indian or Alaska Native; AAIR = age-adjusted incidence rate; CI = confidence interval. The symbol '—' indicates censoring of incidence rate due to low numbers (<16 individuals).

<sup>b</sup> Individuals indicating *any* Native Hawaiian, even if also indicating other races/ethnicities, are categorized as 'Native Hawaiian'.

<sup>c</sup> Pacific Islander, not indicating Native Hawaiian

<sup>d</sup> To account for differential misclassification of smoking by lung cancer status, we conducted a sensitivity analysis whereby AAIRs were recalculated with ever/never smoking status defined using two smoking status values that were *at least three months prior* to the date of diagnosis among cases.

<sup>e</sup> To account for potential loss to follow-up by state cancer registries due to an out-of-state move, we conducted a sensitivity analysis whereby non-cases whose last known address in the EHR was out-of-state were censored at the date of the first out-of-state address.

<sup>f</sup> The percent difference in AAIR of the sensitivity analysis compared to the main analysis (AAIR sensitivity analysis/AAIR main analysis\*100%)

**Supplementary Table 5:** Standardized incidence rate ratios of lung cancer among never-smoking and ever-smoking females; Sutter Health + Kaiser Hawai'i cohort, 2000-2013.<sup>a</sup>

| Smoking status                | Person-years | Observed | With Unknown/missing race/ethnicity |                  | Without Unknown/missing or Other race/ethnicity |                   |
|-------------------------------|--------------|----------|-------------------------------------|------------------|-------------------------------------------------|-------------------|
|                               |              |          | Expected                            | SIR (95% CI)     | Expected                                        | SIR (95% CI)      |
| Never-smoking                 |              |          |                                     |                  |                                                 |                   |
| Any AANHPI                    | 1,176,244    | 235      | 181                                 | 1.30 (1.14-1.48) | 161                                             | 1.46 (1.28, 1.66) |
| Any NHPI                      | 207,462      | 31       | 27                                  | 1.16 (0.79-1.65) | 24                                              | 1.29 (0.88, 1.84) |
| Native Hawaiian <sup>b</sup>  | 130,770      | 23       | 19                                  | 1.24 (0.78-1.85) | 17                                              | 1.38 (0.88, 2.07) |
| Pacific Islander <sup>c</sup> |              | —        |                                     | —                |                                                 | —                 |
| Asian (single or multiple)    | 968,782      | 204      | 154                                 | 1.32 (1.15-1.52) | 137                                             | 1.49 (1.29, 1.71) |
| Asian single group            | 807,753      | 158      | 126                                 | 1.25 (1.06-1.46) | 112                                             | 1.40 (1.19, 1.64) |
| Chinese                       | 200,961      | 59       | 32                                  | 1.84 (1.40-2.38) | 29                                              | 2.07 (1.57, 2.67) |
| Japanese                      | 118,253      | 18       | 38                                  | 0.48 (0.28-0.76) | 33                                              | 0.55 (0.33, 0.87) |
| Filipinx                      | 186,809      | 42       | 28                                  | 1.50 (1.08-2.03) | 25                                              | 1.67 (1.20, 2.25) |
| Other Asian                   | 301,730      | 39       | 29                                  | 1.36 (0.97-1.86) | 26                                              | 1.5 (1.06, 2.05)  |
| Asian multiple                | 161,030      | 46       | 28                                  | 1.66 (1.21-2.21) | 24                                              | 1.88 (1.38, 2.51) |
| Non-Hispanic White            | 1,953,948    | 306      | 394                                 | 0.78 (0.69-0.87) | 349                                             | 0.88 (0.78, 0.98) |
| Black                         |              | —        |                                     | —                |                                                 | —                 |
| Hispanic                      | 392,387      | 31       | 48                                  | 0.64 (0.44-0.91) | 43                                              | 0.72 (0.49, 1.02) |
| Non-AANHPI multiple           | 136,193      | 14       | 23                                  | 0.61 (0.34-1.03) | 20                                              | 0.69 (0.38, 1.16) |
| Unknown/missing               | 1,369,363    | 281      | 205                                 | 1.37 (1.22-1.54) | n/a                                             |                   |
| Ever-smoking                  |              |          |                                     |                  |                                                 |                   |
| Any AANHPI                    | 363,277      | 300      | 300                                 | 1.0 (0.89-1.12)  | 237                                             | 1.27 (1.13, 1.42) |
| Any NHPI                      | 161,166      | 147      | 105                                 | 1.40 (1.18-1.65) | 83                                              | 1.77 (1.49, 2.08) |
| Native Hawaiian <sup>*</sup>  | 114,497      | 121      | 82                                  | 1.48 (1.23-1.76) | 65                                              | 1.87 (1.55, 2.23) |
| Pacific Islander <sup>†</sup> | 46,669       | 26       | 23                                  | 1.13 (0.74-1.65) | 18                                              | 1.41 (0.92, 2.07) |
| Asian (single or multiple)    | 202,111      | 153      | 196                                 | 0.78 (0.66-0.92) | 154                                             | 0.99 (0.84, 1.17) |
| Asian single group            | 144,445      | 103      | 145                                 | 0.71 (0.58-0.86) | 114                                             | 0.90 (0.74, 1.09) |
| Chinese                       |              | —        |                                     | —                |                                                 | —                 |
| Japanese                      | 44,423       | 39       | 66                                  | 0.59 (0.42-0.81) | 52                                              | 0.75 (0.54, 1.03) |
| Filipinx                      | 50,043       | 34       | 38                                  | 0.89 (0.61-1.24) | 30                                              | 1.12 (0.78, 1.57) |
| Other Asian                   | 34,627       | 22       | 23                                  | 0.95 (0.60-1.44) | 18                                              | 1.20 (0.75, 1.81) |
| Asian multiple                | 57,666       | 50       | 50                                  | 1.0 (0.74-1.32)  | 40                                              | 1.26 (0.94, 1.67) |
| Non-Hispanic White            | 983,234      | 991      | 1,343                               | 0.74 (0.69-0.79) | 1,052                                           | 0.94 (0.88, 1.00) |
| Black                         | 51,882       | 69       | 62                                  | 1.12 (0.87-1.42) | 48                                              | 1.43 (1.11, 1.81) |
| Hispanic                      | 113,548      | 41       | 92                                  | 0.45 (0.32-0.60) | 73                                              | 0.56 (0.41, 0.77) |
| Non-AANHPI multiple           | 70,097       | 80       | 76                                  | 1.05 (0.83-1.31) | 60                                              | 1.33 (1.06, 1.66) |
| Unknown/missing               | 490,087      | 918      | 509                                 | 1.80 (1.69-1.92) | n/a                                             |                   |

<sup>a</sup> The incidence rate among all females who never smoked (combined) or all females who ever smoked (combined) is the reference group. AANHPI = Asian American, Native Hawaiian, or Pacific Islander; NHPI = Native Hawaiian or Pacific Islander; AIAN = American Indian or Alaska Native; AAIR = age-adjusted incidence rate; CI = confidence interval. The symbol '—' indicates censoring of incidence rate due to low numbers (<16 individuals).

<sup>b</sup> Individuals indicating *any* Native Hawaiian, even if also indicating other races/ethnicities, are categorized as 'Native Hawaiian'.

<sup>c</sup> Pacific Islander, not indicating Native Hawaiian

**Supplementary Figure 1:** Person-years of follow-up, lung cancer case frequencies, age-adjusted incidence rates per 100,000, 95% confidence intervals, and corresponding forest plots for (A) males who have never smoked (all histologies combined) and (B) males who ever smoked, by detailed race/ethnicity, Sutter Health + Kaiser Hawai'i cohort, 2000-2013. Age-adjusted incidence rates are not reported for Any NHPI, Any Native Hawaiian, Any other Pacific Islander, Japanese, Other Asian, Black, or non-AANHPI multiple males who never smoked due to low frequencies of cases (<16). AAIR = Age-adjusted incidence rate; AANHPI = Asian American, Native Hawaiian, or Pacific Islander; NHPI = Native Hawaiian or Pacific Islander; AIAN = American Indian or Alaska Native.

A

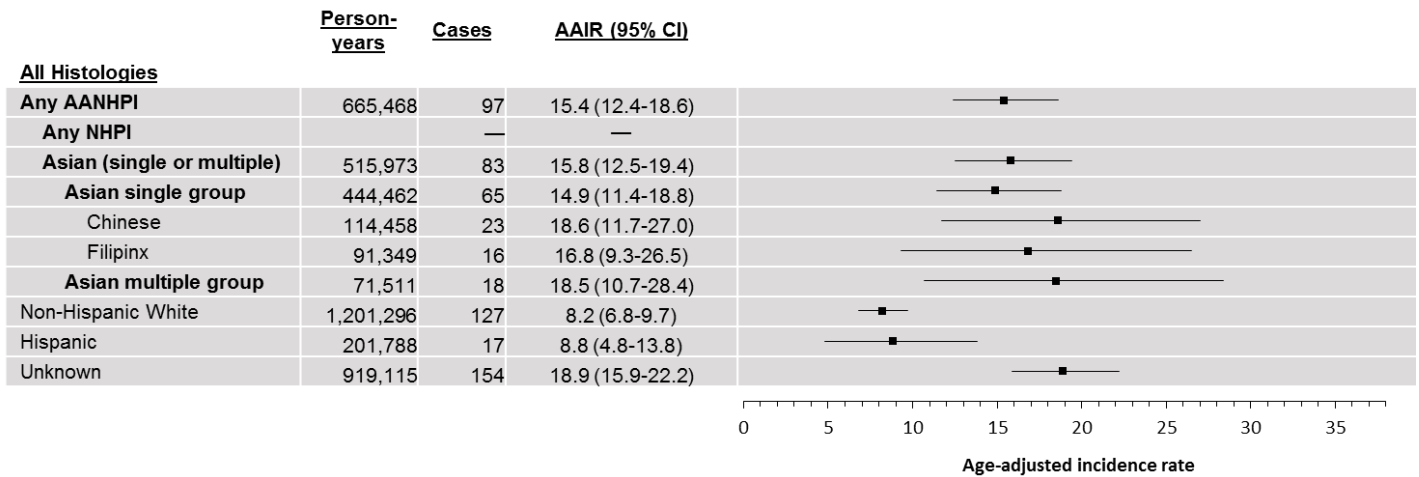

B

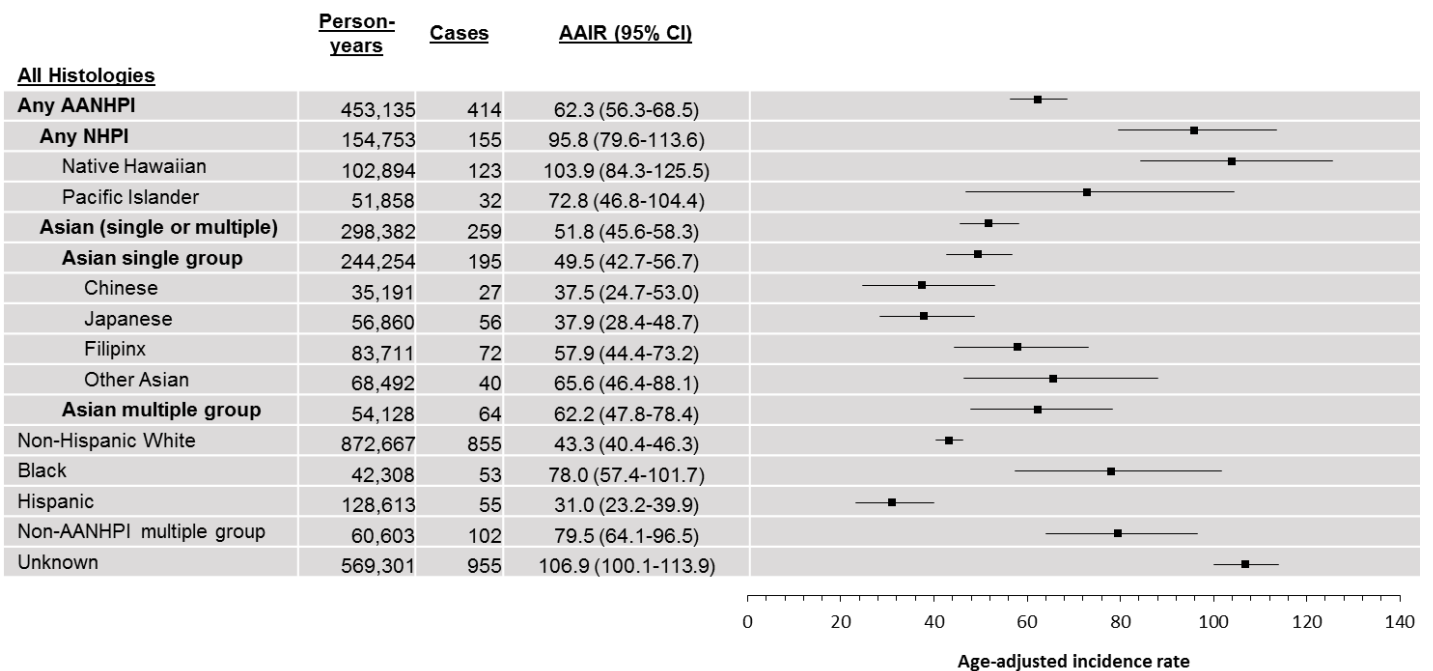

Supplement: djab143_supplementary_data.pdf [file djab143_supplementary_data.pdf]
